# Supplementary material for: Viral infection induces inflammatory signals that coordinate YAP regulation of dysplastic cells in lung alveoli
Source: JCI journal article supplement (doi:10.1172/jci176828), 2024-09-30
Supplement: sd1 [file 1]

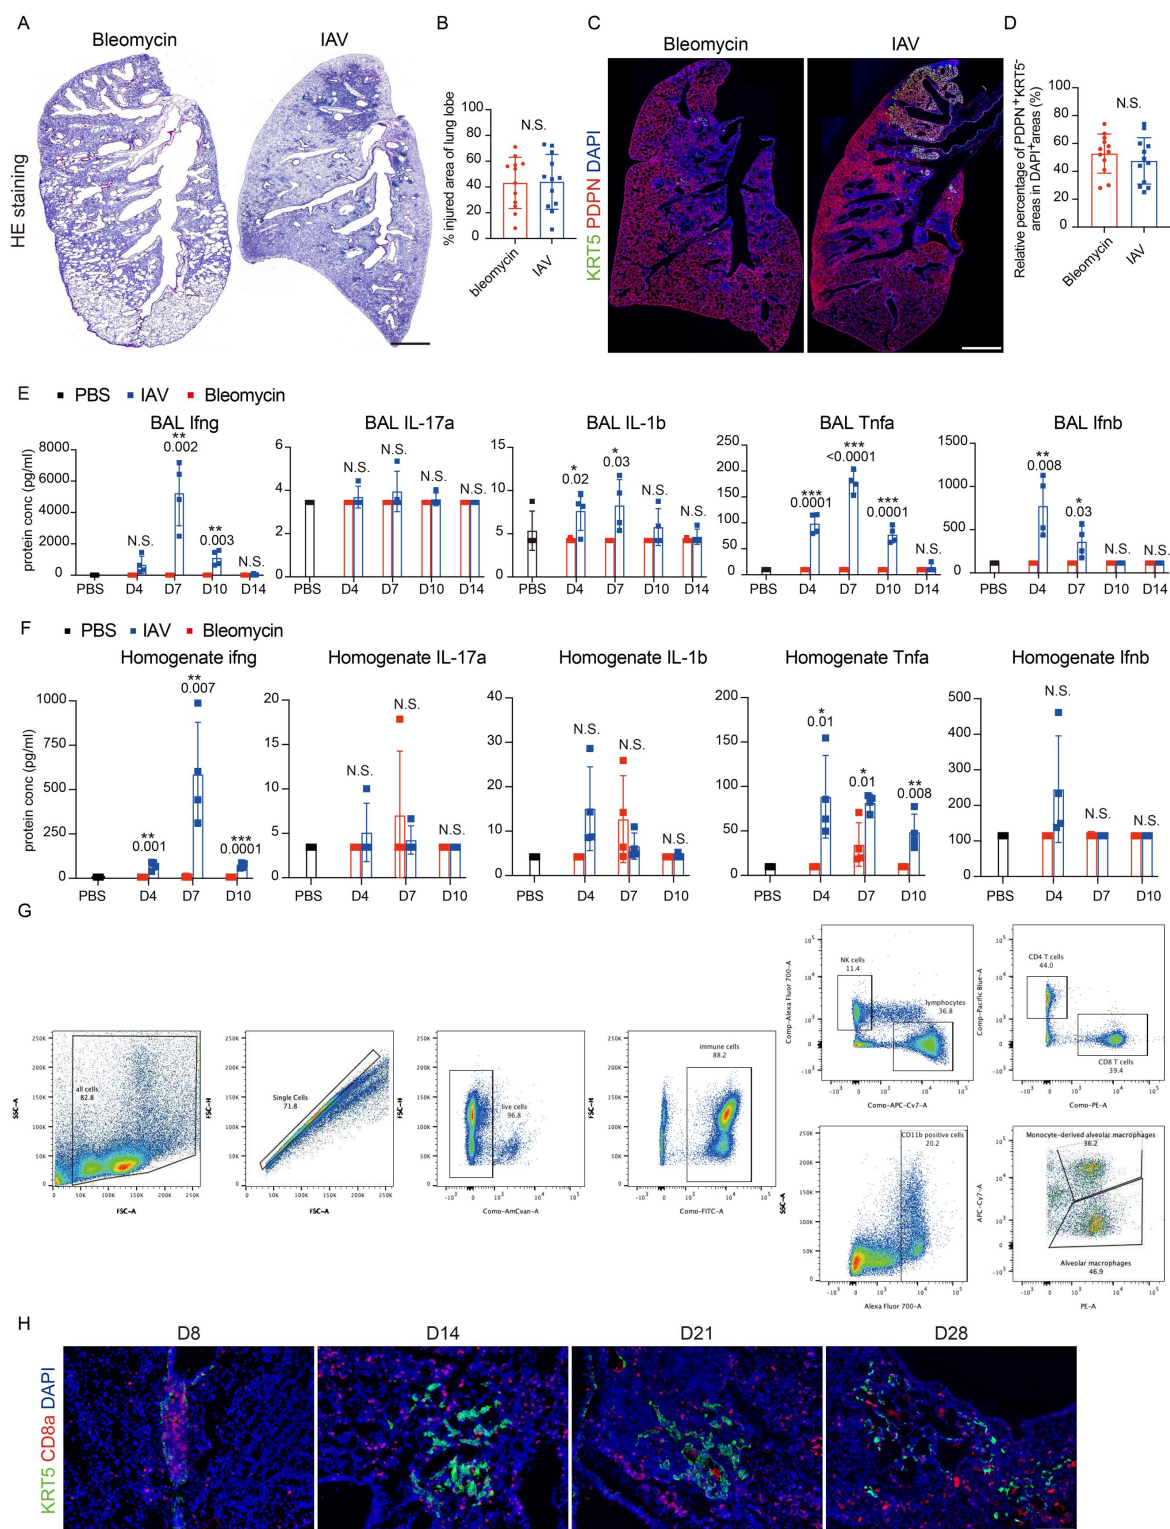

**Supplemental Figure 1. CD8<sup>+</sup> T cells persist in the KRT5<sup>+</sup> alveolar area after IAV infection.** (A-B) Hematoxylin and eosin (H&E) staining and quantification of remodeling alveolar areas in IAV and bleomycin model (n = 12 mice per group). Scale bars: 500  $\mu$ m. (C-D) Immunofluorescence analysis and quantification of percentages of PDPN<sup>+</sup> KRT5<sup>-</sup> areas in whole left lung areas (DAPI<sup>+</sup>) in IAV and bleomycin model (n = 12 mice per group). Scale bars: 500  $\mu$ m. (E) Inflammatory cytokines in BAL from IAV and bleomycin mice lung (n = 4 mice per group). (F) Inflammatory cytokines in IAV and bleomycin injured lung homogenate (n = 4 mice per group). (G) Representative plots for analyzing total lymphocytes, NK cells, CD4<sup>+</sup> T cells, CD8<sup>+</sup> T cells, alveolar macrophages, and monocyte-derived inflammatory macrophages. (H) Immunofluorescence images of CD8<sup>+</sup> T cells with KRT5<sup>+</sup> cells at indicated time points after IAV challenge. Data are representative of sections from 3 mice at each time point. Scale bars: 50  $\mu$ m. \* for P < 0.05; \*\* for P < 0.01; \*\*\* for P < 0.001. Error bars represent means  $\pm$  SEM. Two-tailed Student's t test for B and D; Multiple t test for E and F.

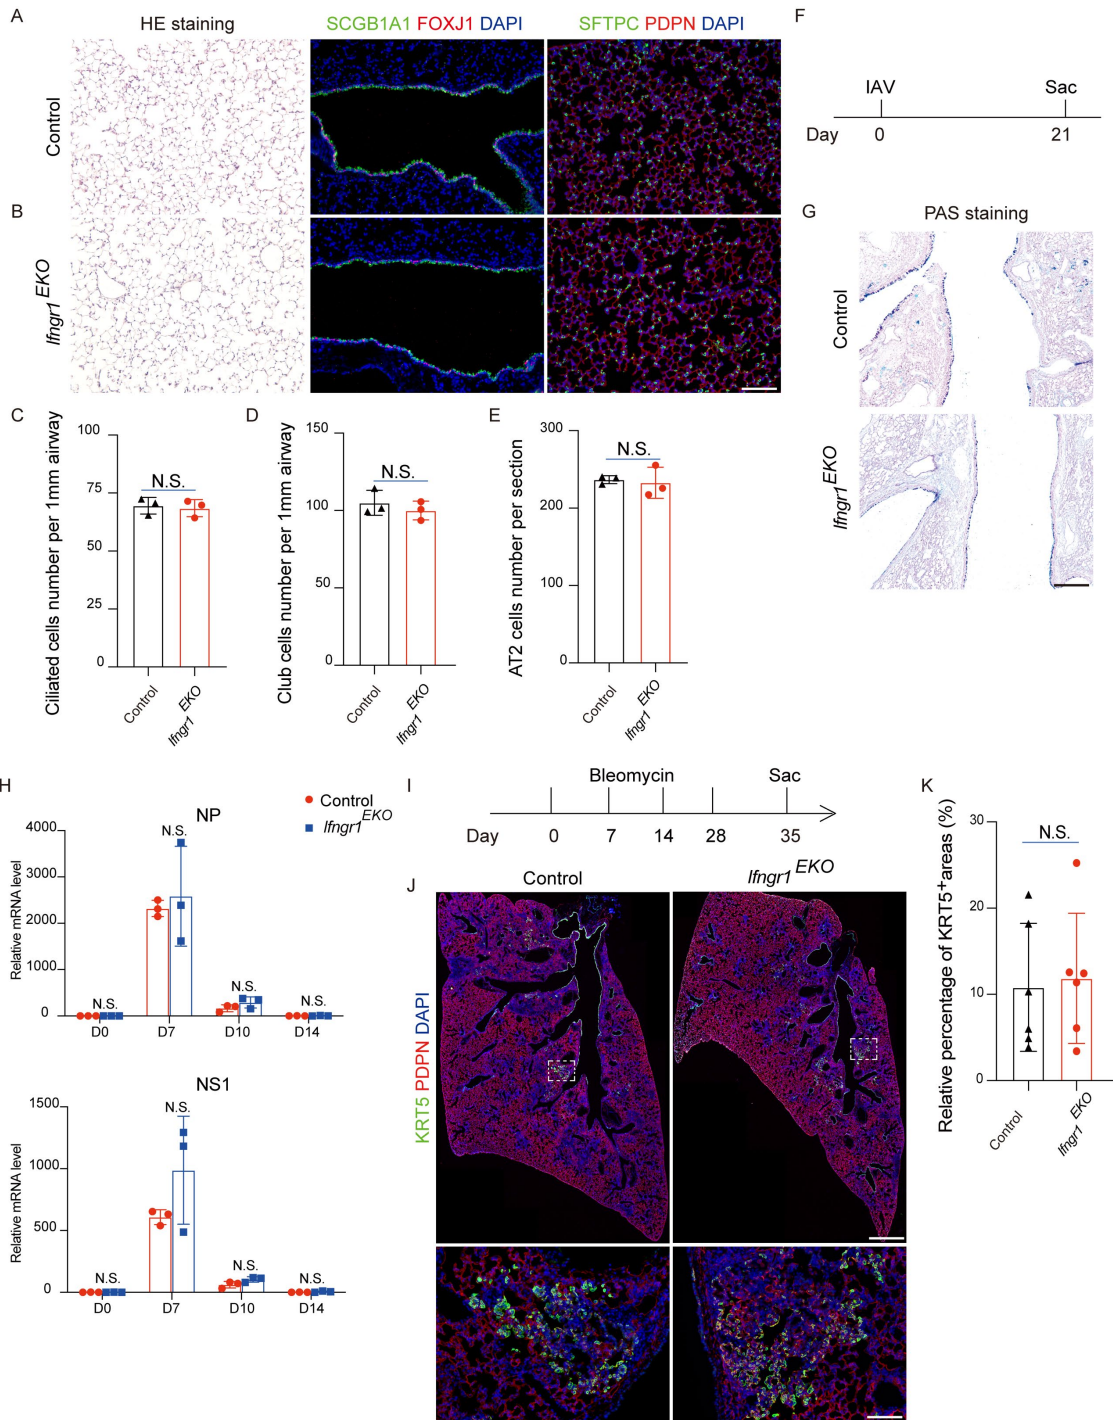

**Supplemental Figure 2. The role of interferon signaling in homeostasis and in regulated dysplastic alveolar remodeling following IAV or bleomycin injury. (A-E)** *Ifngr1<sup>EKO</sup>* mutant mice showed comparable number of SCGB1A1<sup>+</sup> club cells, FOXJ1<sup>+</sup> ciliated cells, SFTPC<sup>+</sup> AT2 cells, and PDPN<sup>+</sup> AT1 cells as control mice (n = 3 mice per group). Scale bars: 50  $\mu$ m. **(F)** Illustration of influenza A virus (IAV; PR8 strain) infection model. **(G)** PAS staining showing goblet cells hyperplasia in the airway in both control and *Ifngr1<sup>EKO</sup>* mice after IAV challenge. Data are representative of sections from 3 mice respectively. Scale bars: 50  $\mu$ m. **(H)** Expression of influenza specific genes, nucleoprotein (NP) and Non-Structural Protein 1 (NS1), as assayed by qRT-PCR in control and *Ifngr1<sup>EKO</sup>* mice after IAV challenge at indicated time points (n = 3 mice per group). **(I)** Illustration of repetitive bleomycin challenge induced lung injury model. **(J)** Immunofluorescence images of dysplastic KRT5<sup>+</sup> cells and PDPN<sup>+</sup> AT1 cells in control, and *Ifngr1<sup>EKO</sup>* mice lungs after repetitive bleomycin treatment. Scale bars: 500  $\mu$ m (top row) and 50  $\mu$ m (bottom row). **(K)** Quantification of percentages of KRT5<sup>+</sup> alveolar area in total damaged lung area (PDPN<sup>-</sup> and KRT5<sup>+</sup>) in control and *Ifngr1<sup>EKO</sup>* mice after bleomycin treatment (n = 6 mice per group). \* for P < 0.05; \*\* for P < 0.01; \*\*\* for P < 0.001. Error bars represent means  $\pm$  SEM. Two-tailed Student's t test for **C-E**; Multiple t test for **H**; two-tailed Mann–Whitney U test for **K**.

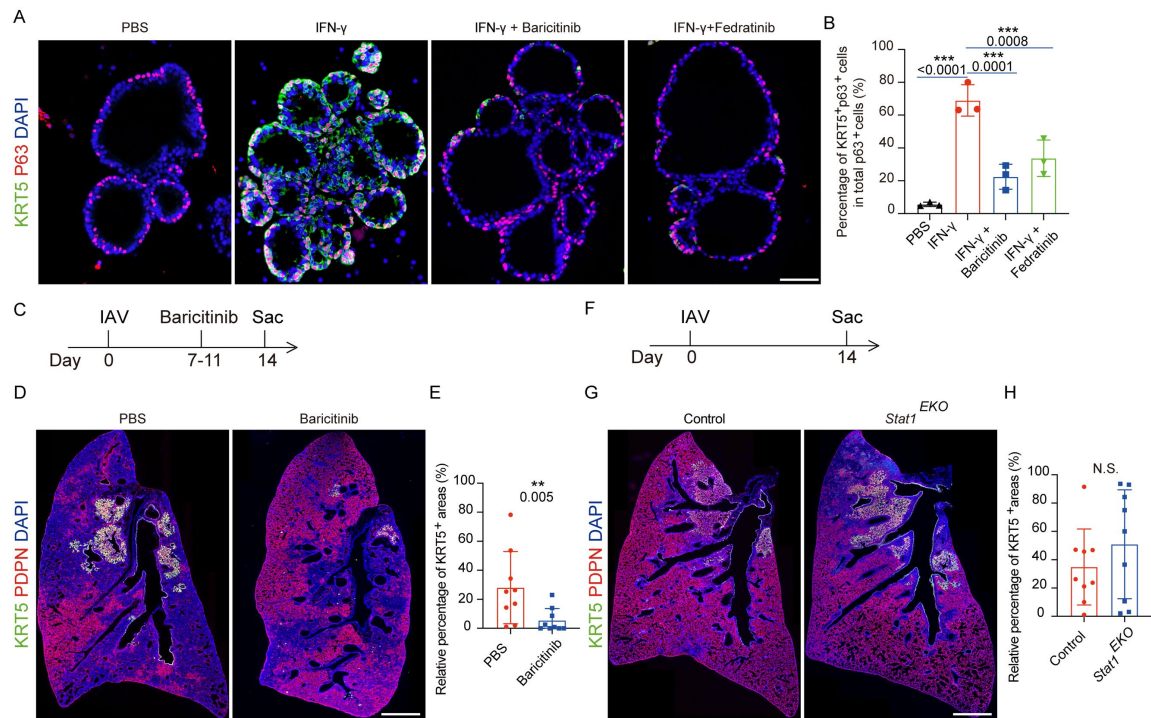

**Supplemental Figure 3. IFN- $\gamma$  regulates lung dysplastic remodeling in a *Stat1* independent manner. (A-B)** Immunofluorescence staining and quantification of percentages of KRT5<sup>+</sup> p63<sup>+</sup> cells in total p63<sup>+</sup> cells of PBS, IFN- $\gamma$ , IFN- $\gamma$  and Baricitinib, or IFN- $\gamma$  and Fedratinib treated organoids (n = 3 technical replicates, experiment repeated twice). Scale bars: 25  $\mu$ m. **(C-E)** Experiment design and quantification of percentages of KRT5<sup>+</sup> dysplastic cell areas in damage alveolar areas (PDPN<sup>-</sup> and KRT5<sup>+</sup>) in control and Baricitinib mice at 14 dpi (n = 9 mice per group). Scale bars: 500  $\mu$ m. **(F-H)** Experiment design and quantification of percentages of KRT5<sup>+</sup> dysplastic cell areas in damage alveolar areas (PDPN<sup>-</sup> and KRT5<sup>+</sup>) in control and *Stat1*<sup>EXO</sup> mutant mice at 14 dpi (n = 9 mice per group). Scale bars: 500  $\mu$ m. \* for P < 0.05; \*\* for P < 0.01; \*\*\* for P < 0.001. Error bars represent means  $\pm$  SEM. One-way ANOVA for **B**; two-tailed Mann–Whitney U test for **E** and **H**.

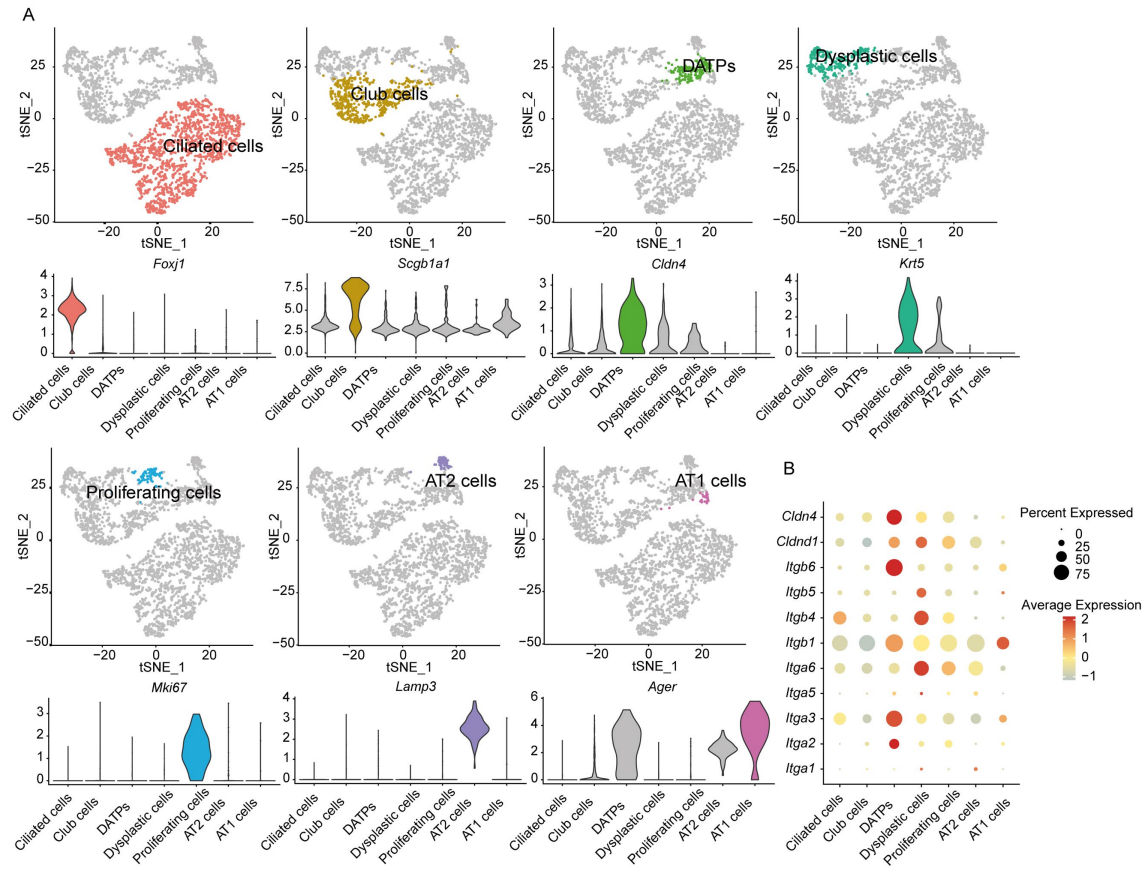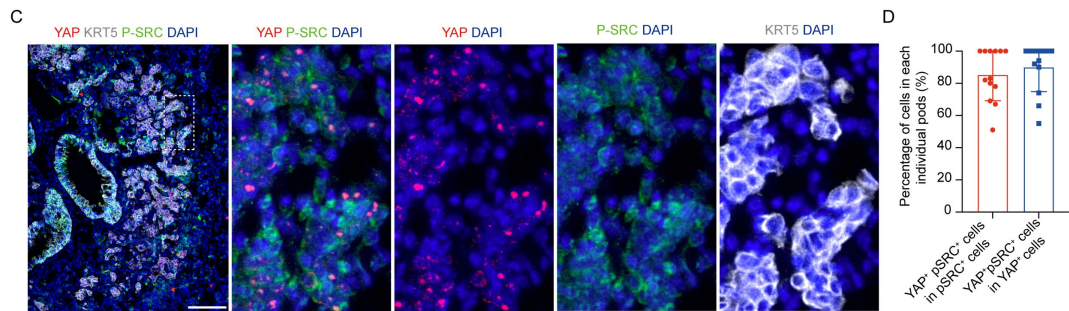

**Supplemental Figure 4. Single-cell analysis of lung epithelial cells from IAV infected lungs.** (A) t-SNE showing the expression of marker genes in each cell cluster. (B) Dot plot showing the expression of integrin and focal adhesion related genes in all epithelial cells. (C-D) Immunofluorescence staining and quantification of percentages of YAP<sup>+</sup>pSRC<sup>+</sup> cells in pSRC<sup>+</sup> cells or YAP<sup>+</sup>pSRC<sup>+</sup> cells in YAP<sup>+</sup> cells in each individual pods at 12 dpi (n = 13 pods from 5 mice). Scale bars: 50  $\mu$ m. \* for P < 0.05; \*\* for P < 0.01; \*\*\* for P < 0.001. Error bars represent means  $\pm$  SEM. Two-tailed Mann–Whitney U test for E.

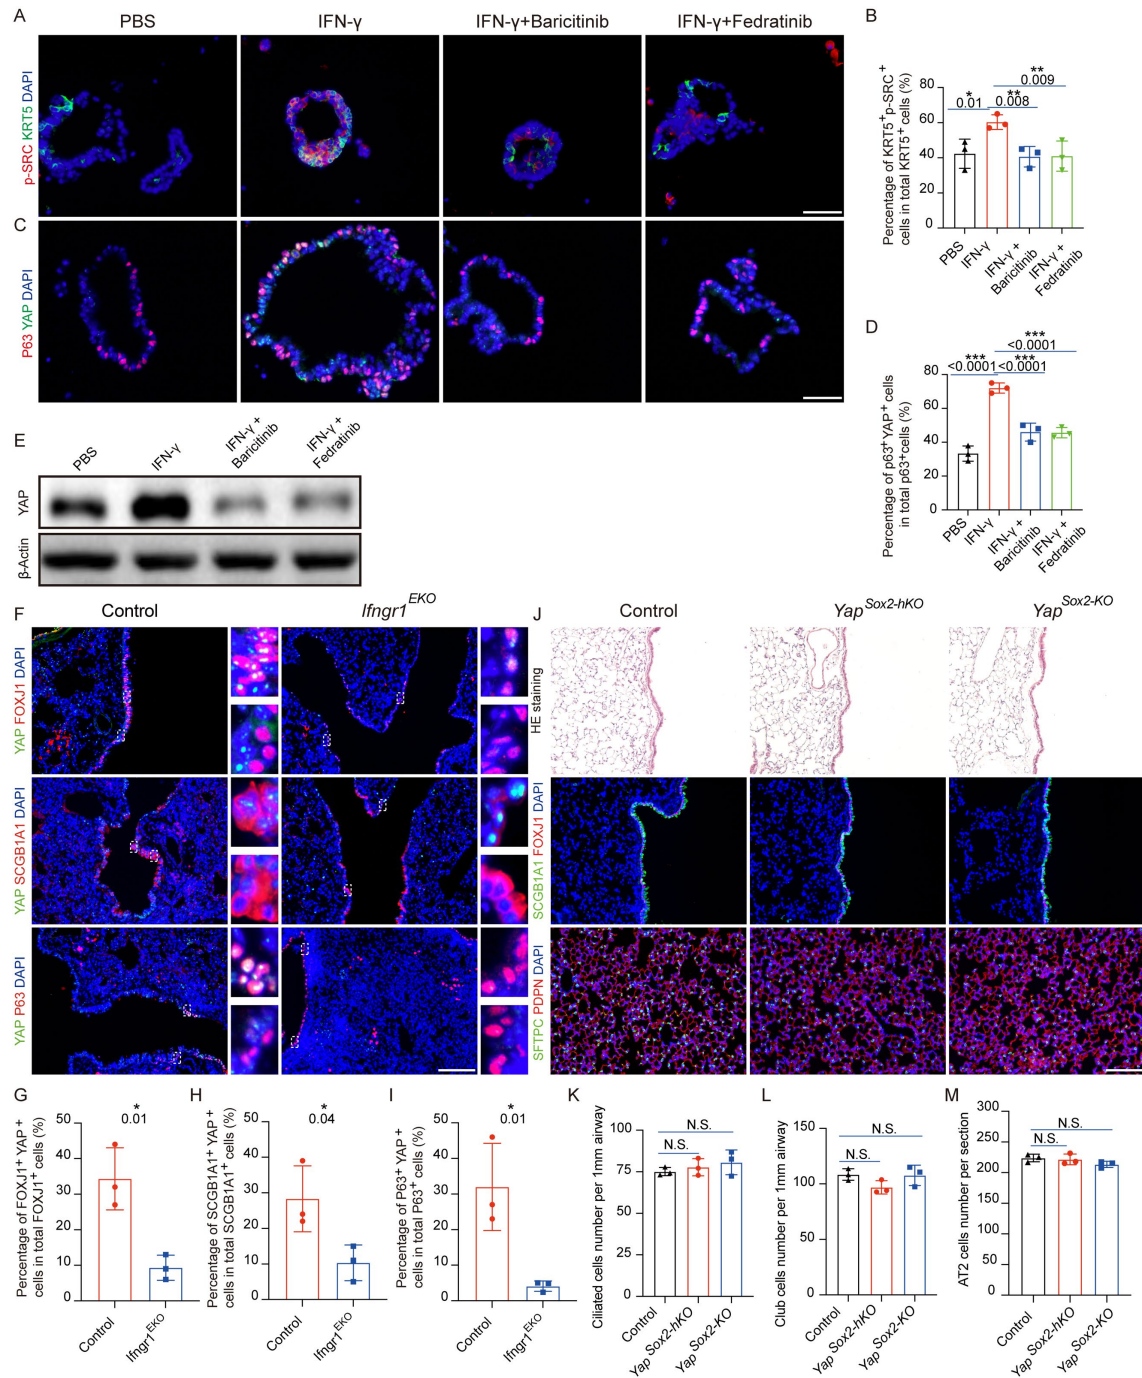

**Supplemental Figure 5. IFN- $\gamma$  promote p-SRC and YAP activation.** (A-B) Immunofluorescence staining and quantification of KRT5<sup>+</sup> pSRC<sup>+</sup> cells in KRT5<sup>+</sup> cells treated with PBS, IFN- $\gamma$ , IFN- $\gamma$  and JAK inhibitor Baricitinib or Fedratinib (n = 3 technical replicates, experiment repeated twice). Scale bars: 25  $\mu$ m. (C-D) Immunofluorescence images and quantification of the number of YAP<sup>+</sup> p63<sup>+</sup> cells in cultured mouse intrapulmonary p63<sup>+</sup> cells treated with PBS, IFN- $\gamma$ , IFN- $\gamma$  and JAK inhibitor Baricitinib or Fedratinib (n = 3 technical replicates, experiment repeated twice). Scale bars: 25  $\mu$ m. (E) Western blot analysis of YAP protein in cultured intrapulmonary p63<sup>+</sup> cells treated with PBS, IFN- $\gamma$ , IFN- $\gamma$  and Baricitinib, IFN- $\gamma$  and Fedratinib. (F-I) Immunofluorescence staining and quantification of cells expressing nuclear YAP in control and *Ifngr*<sup>EKO</sup> mice at 14 dpi (n = 3 mice per group). Scale bars: 50  $\mu$ m. (J) H&E staining or immunofluorescence images of SCGB1A1<sup>+</sup> club cells, FOXJ1<sup>+</sup> ciliated cells, SFTPC<sup>+</sup> AT2 cells, and PDPN<sup>+</sup> AT1 cells in control and mutant mice at homeostasis. Scale bars: 50  $\mu$ m. (K-M) Quantification of number of SCGB1A1<sup>+</sup> club cells, FOXJ1<sup>+</sup> ciliated cells, and SFTPC<sup>+</sup> AT2 cells in control and mutant mice at homeostasis (n = 3 mice per group). \* for P < 0.05; \*\* for P < 0.01; \*\*\* for P < 0.001. Error bars represent means  $\pm$  SEM. One-way ANOVA for **B** and **D**, **K-M**; two-tailed Student's t test for **G-I**.

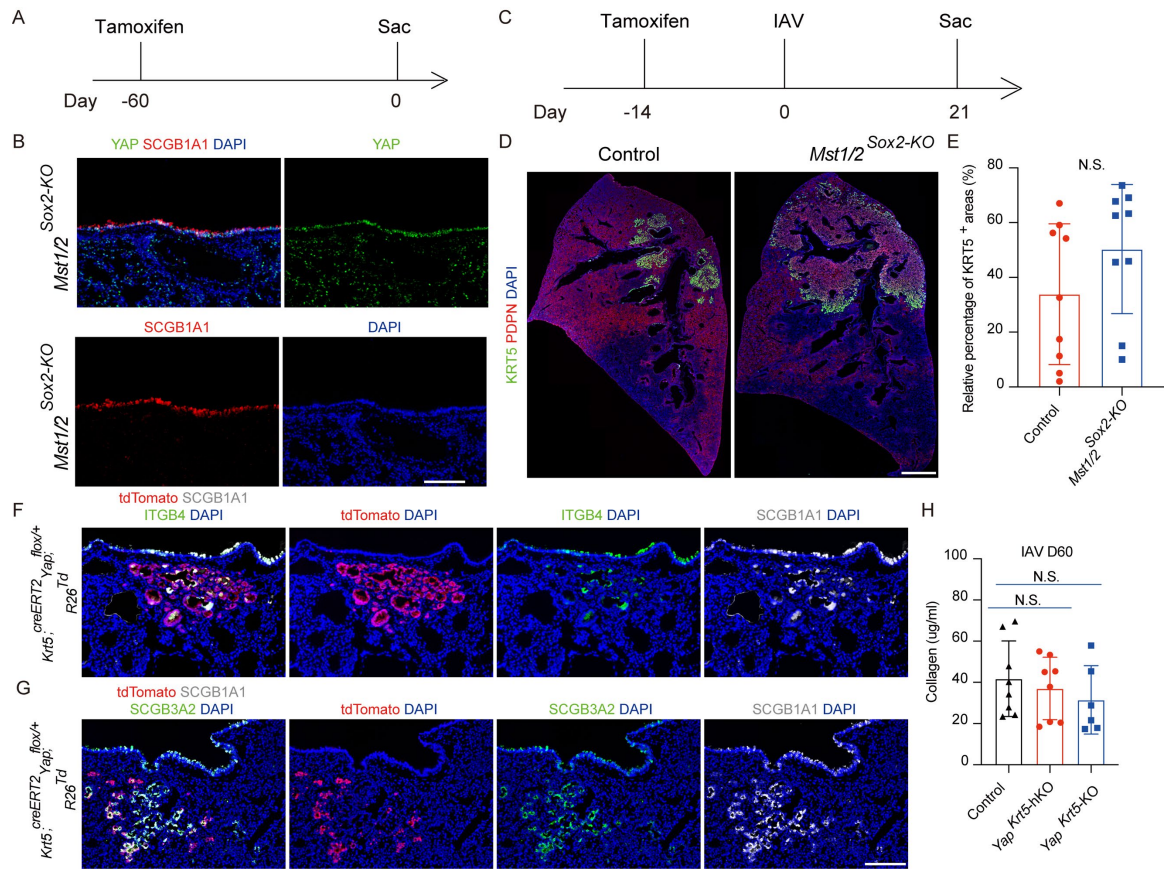

**Supplemental Figure 6. Further validation of YAP function in regulating dysplastic cells.** (A-B) Experiment design and immunofluorescence images of YAP and SCGB1A1 in *Mst1/Mst2*<sup>Sox2-KO</sup> mutant mice at homeostasis. Data are representative of sections from 3 mice. Scale bars: 50  $\mu$ m. (C-D) Experiment design and immunofluorescence images of dysplastic KRT5<sup>+</sup> cells and PDPN<sup>+</sup> AT1 in control and *Mst1/Mst2*<sup>Sox2-KO</sup> mutant mice lungs after IAV challenge. Scale bars: 500  $\mu$ m. (E) Quantification of the percentages of KRT5<sup>+</sup> alveolar area in total damaged lung area (PDPN<sup>-</sup> and KRT5<sup>+</sup>) in control and *Mst1/Mst2*<sup>Sox2-KO</sup> mutant mice lungs after IAV challenge (n = 9 mice per group). (F-G) Representative IHC showing ITGB4 and SCGB3A2 expressing in lineage-traced SCGB1A1<sup>+</sup> cells in *Krt5*<sup>creERT2/+</sup>; *Yap*<sup>flox/+</sup>; *R26*<sup>Td</sup> mice at 35 dpi. Data are representative of sections from 3 mice respectively. Scale bars: 50  $\mu$ m. (H) Quantitative analysis of collagen content in lung homogenates from control, *Yap*<sup>Krt5-hKO</sup>, and *Yap*<sup>Krt5-KO</sup> mice at 60 dpi (Tamoxifen at day 21 post infection) (n  $\geq$  6 mice per group). \* for P < 0.05; \*\* for P < 0.01; \*\*\* for P < 0.001. Error bars represent means  $\pm$  SEM. Two-tailed Mann–Whitney U test for E; One-way ANOVA for H.

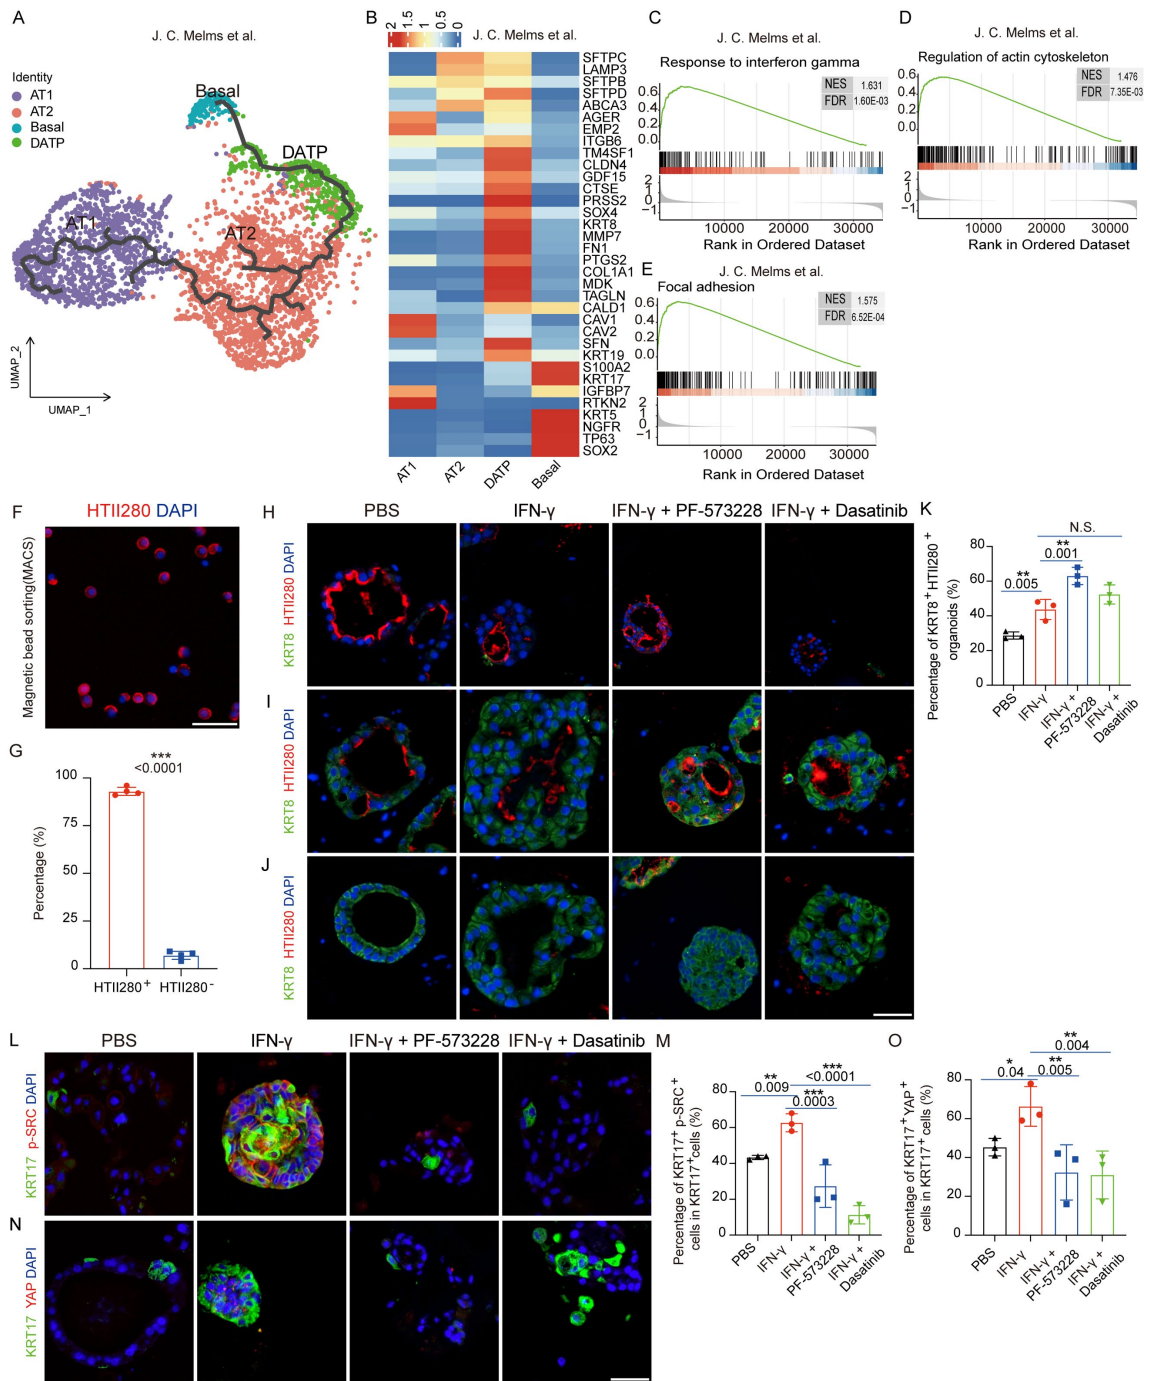

**Supplemental Figure 7. SC-RNA seq analysis for Covid19 lung epithelial and human organoid culture.** (A) Single-cell RNA-Seq t-SNE clustering of lung epithelial cells from Covid-19 patient. (B) Heatmap showing marker genes expression in each cell cluster. (C-E) Gene Set Enrichment Analysis (GSEA) revealed that in Covid-19 lungs, response to IFN- $\gamma$ , regulation of actin cytoskeleton, and focal adhesion pathway were highly activated in KRT8<sup>+</sup> dysplastic cells compared to in AT2 cells. (F) Magnetic bead sorting (MACS) HTII 280<sup>+</sup> human AT2 cells. Scale bars: 25  $\mu$ m. (G) Purity of sorted HTII-280<sup>+</sup> cells (n = 4 biological replicates). (H-J) Representative images of HTII-280<sup>+</sup> KRT8<sup>-</sup>, HTII-280<sup>+</sup> KRT8<sup>+</sup>, and HTII-280<sup>-</sup> KRT8<sup>+</sup> organoids from each group. Scale bars: 25  $\mu$ m. (K) Quantification of KRT8<sup>+</sup> HTII-280<sup>+</sup> organoids in total human AT2 organoids treated with PBS, IFN- $\gamma$ , IFN- $\gamma$  and SRC inhibitor (Dasatinib) or IFN- $\gamma$  and FAK inhibitor (PF-573228) (n = 3 technical replicates, experiment repeated twice). (L-O) Immunofluorescence staining and quantification of percentages of p-SRC<sup>+</sup>KRT17<sup>+</sup> cells and YAP<sup>+</sup>KRT17<sup>+</sup> cells in KRT17<sup>+</sup> cells from human AT2 organoid treated with PBS, IFN- $\gamma$ , IFN- $\gamma$  and SRC inhibitor (Dasatinib) or IFN- $\gamma$  and FAK inhibitor (PF-573228) (n = 3 technical replicates, experiment repeated twice). Scale bars: 25  $\mu$ m. \* for P < 0.05; \*\* for P < 0.01; \*\*\* for P < 0.001. Error bars represent means  $\pm$  SEM. Two-tailed Student's t test for G; One-way ANOVA for K, M, and O.

**Supplemental Table 1.**  
Human lung Information

| <b>Donor (D)</b> | <b>Age</b> | <b>Sex</b> | <b>disease</b>           |
|------------------|------------|------------|--------------------------|
| D1               | 14         | F          | pneumothorax             |
| D2               | 13         | F          | pneumothorax             |
| D3               | 14         | F          | Pulmonary bullae         |
| D4               | 10         | F          | Secondary Lung Tumors    |
| D5               | 16         | M          | pneumothorax             |
| D6               | 6          | M          | Mediastinal Tumor (Mass) |
| D7               | 13         | M          | pneumothorax             |

**Supplemental Table 2.**

Covid19 patient lung tissue Information

| <b>Patient (P)</b> | <b>Age</b> | <b>Sex</b> | <b>disease</b> |
|--------------------|------------|------------|----------------|
| P1                 | 63         | F          | Covid19        |
| P2                 | 54         | M          | Covid19        |

**Supplemental Table 3.**

qPCR primers

|              |                                                                        |
|--------------|------------------------------------------------------------------------|
| <i>Ifng</i>  | 5' - GAGGAACTGGCAAAAGGATGGT -3'<br>5' - TTTCGCCTTGCTGTTGCTGA -3'       |
| <i>Ifnb</i>  | 5' - CCTGGAGCAGCTGAATGGAA -3'<br>5' - CCACCCAGTGCTGGAGAAAT -3'         |
| <i>Il5</i>   | 5'- AACTGTCCGTGGGGGTACT -3'<br>5'- CTCGCCACACTTCTCTTTTTTGG -3'         |
| <i>Il22</i>  | 5'- GTGAGAAGCTAACGTCCATCATT -3'<br>5'- CTGGTCTCATGGACAACCTTGA -3'      |
| <i>Il1b</i>  | 5'- TGCCACCTTTTGACAGTGATG -3'<br>5'- TGATGTGCTGCTGCGAGATT -3'          |
| <i>Il17a</i> | 5'- ACCCTGGACTCTCCACCGCAA -3'<br>5'- GGTGGTCCAGCTTTCCCTCCG -3'         |
| <i>Il13</i>  | 5'-AAAGCAACTGTTTCGCCACG-3'<br>5'-CCTCTCCCCAGCAAAGTCTG-3'               |
| <i>Tnfa</i>  | 5'- TAGCCCACGTCTGTAGCAAAC -3'<br>5'- ACAAGGTACAACCCATCGGC -3'          |
| <i>Krt5</i>  | 5'- GCAGACACACGTCTCTGACA -3'<br>5'- TGCAGCTCCTCATACTTGGT -3'           |
| PR8-NP       | 5'- ACGGCTGGTCTGACTCACAT -3'<br>5'- TCCATTCCGGTGCGAACAAG -3'           |
| PR8-NS1      | 5'- AGCAGATAGTGGAGCGGATT -3'<br>5'- GTACAGAGGCCATGGTCATT -3'           |
| <i>Tubb1</i> | 5'- CGGCCAGGTCATCACTATTGGCAAC -3'<br>5'- GCCACAGGATTCCATACCCAAGAAG -3' |
